# Supplementary material for: Aberrations in Oxidative Stress Markers in Amyotrophic Lateral Sclerosis: A Systematic Review and Meta-Analysis
Source: Hindawi journal article supplement (doi:10.1155/2019/1712323), 2019-06-09
Supplement: f1 [file 1712323.f1.pdf]

**Supplementary Table: Characteristics of included studies measuring peripheral blood oxidative stress marker levels**

| Author/year             | Country   | groups  | N (ALS/<br>Control) | Gender<br>(% Male)<br>(ALS/<br>Control) | Age<br>(ALS/Control) | Disease<br>Duration<br>(months) | Diagnosis   | Oxidative Stress Marker<br>Measured                   | Sample<br>Origin            |
|-------------------------|-----------|---------|---------------------|-----------------------------------------|----------------------|---------------------------------|-------------|-------------------------------------------------------|-----------------------------|
| Ahmed et al. 2018       | Australia | ALS/ NC | 37/32               | 70/38                                   | 55.9/64.7            | 20.4                            | NA          | Total cholesterol, LDL, HDL, TG                       | Blood                       |
| Baillet et al. 2010     | France    | ALS/ NC | 31/30               | 55/37                                   | 63/39.4              | NA                              | El Escorial | MDA, GSH, Cu                                          | Plasma                      |
| Barros et al. 2018      | Brazil    | ALS/ NC | 27/26               | 48/42                                   | 56/55.4              | 46                              | NA          | Cu, Ceruloplasmin,<br>Total cholesterol, LDL, HDL, TG | Plasma<br>& Serum           |
| Benedetti et al. 2017   | Italy     | ALS/ NC | 6/5                 | 50/NA                                   | 67.2/63.7            | 87.6                            | El Escorial | Cu                                                    | Blood                       |
| Blasco et al. 2016      | France    | ALS/ NC | 9/10                | 44.4/40                                 | 65.7/65.4            | NA                              | El Escorial | SOD, GSH-Px, GSH, 8-OHdG,<br>MDA, Cu                  | Blood,<br>Serum<br>& Plasma |
| Boll et al. 2014        | México    | ALS/ NC | 18/31               | 80/50                                   | 56.06/52.08          | 46.55                           | El Escorial | GSH-Px, GSH, SOD                                      | Plasma                      |
| Chio et al. 2009        | Italy     | ALS/ NC | 658/658             | 52/52                                   | NA                   | NA                              | El Escorial | Total cholesterol, HDL, LDL, TG                       | Serum                       |
| Conti et al. 2008       | Italy     | ALS/ NC | 5/6                 | NA                                      | NA                   | NA                              | El Escorial | Ceruloplasmin                                         | Plasma                      |
| Delaye J.B. et al. 2017 | France    | ALS/ NC | 30/29               | 50/51.8                                 | 66.5/66.3            | NA                              | NA          | Lipoprotein, Total cholesterol,<br>LDL, HDL           | Serum                       |
| Dupuis et al. 2008      | France    | ALS/ NC | 369/286             | 57/NA                                   | 57.5/NA              | NA                              | El Escorial | Total cholesterol, HDL, LDL, TG                       | Serum                       |
| Ehrhart et al. 2015     | USA       | ALS/ NC | 13/7                | 92/43                                   | 53.85 /57.71         | 41.77                           | El Escorial | GSH                                                   | Serum                       |
| Huang et al. 2015       | China     | ALS/ NC | 413/400             | NA                                      | NA                   | 21.8                            | El Escorial | Total cholesterol, HDL, LDL, TG                       | Serum                       |
| Ihara et al. 2005       | Japan     | ALS/ NC | 28/16               | NA/NA                                   | 61.24/63.25          | NA                              | NA          | SOD, Cu                                               | Plasma                      |
| Ikeda et al. 2009       | Japan     | ALS/ NC | 49/50               | 65/60                                   | 58.8/59.1            | NA                              | El Escorial | Uric acid                                             | Serum                       |
| Ikeda et al. 2012       | Japan     | ALS/ NC | 92/92               | 62/62                                   | 58.8/59.2            | 23.7                            | El Escorial | transferrin, HDL, LDL, TG, Total<br>cholesterol       | Serum                       |
| Kanisa et al. 1997      | Greece    | ALS/ NC | 28/59               | 68/61                                   | 57.9/43.8            | NA                              | NA          | Cu                                                    | Serum                       |
| Keizman et al. 2009     | Israel    | ALS/ NC | 86/86               | 65/65                                   | 58/57.8              | NA                              | El Escorial | Uric acid                                             | Serum                       |
| Kihira et al. 2013      | Japan     | ALS/ NC | 9/51                | 67/35                                   | 65.3/73              | NA                              | El Escorial | Cu, 8-OHdG                                            | Serum                       |
| Kim et al. 2017         | Korea     | ALS/ NC | 39/33               | 49/48                                   | 53.6/50.52           | NA                              | El Escorial | Total cholesterol                                     | Serum                       |
| LoGerfo et al. 2014     | Italy     | ALS/ NC | 73/68               | 49/65                                   | 63.3/69.3            | NA                              | NA          | AOPP                                                  | Plasma                      |
| Mitchell et al. 2010    | USA       | ALS/ NC | 10/12               | NA                                      | NA                   | NA                              | El Escorial | Transferrin                                           | Plasma                      |
| Mokuno et al. 1996      | Japan     | ALS/ NC | 20/120              | NA                                      | NA                   | NA                              | NA          | SOD                                                   | Serum                       |
| Molina et al. 2000      | Spain     | ALS/ NC | 30/42               | 47/56                                   | 61.8/59.7            | 24                              | El Escorial | Co-Q10                                                | Serum                       |
| Moumen et al. 1997      | France    | ALS/ NC | 21/7                | 24/72                                   | NA                   | NA                              | El Escorial | GSH-Px, SOD, MDA                                      | Plasma                      |

|                            |             |         |          |       |              |       |                         |                                      |                |
|----------------------------|-------------|---------|----------|-------|--------------|-------|-------------------------|--------------------------------------|----------------|
| Nadjar et al. 2012         | France      | ALS/ NC | 694/297  | 52/58 | 61.85 /48.99 | NA    | NA                      | Transferrin                          | Serum          |
| Nagase et al. 2016         | Japan       | ALS/ NC | 26/55    | 54/69 | 60.9/60.1    | NA    | NA                      | Total cholesterol, Uric acid, Co-Q10 | Plasma         |
| Oh et al. 2015             | Korea       | ALS/ NC | 136/136  | 51/51 | 55.0/54.7    | 13.6  | El Escorial             | Uric acid                            | Serum          |
| Oteiza et al. 1997         | Argentina   | ALS/ NC | 19/11    | 46/73 | NA           | NA    | NA                      | Co-Q10                               | Plasma         |
| Pasquinelli et al. 2016    | Italy       | ALS/ NC | 74/65    | NA    | 62.4/74      | 83.2  | NA                      | AOPP                                 | Plasma         |
| Peters et al. 2016         | USA         | ALS/ NC | 163/229  | 98/94 | 62.9/63.4    | NA    | El Escorial             | Cu                                   | Blood          |
| Radunovic et al. 1997      | UK          | ALS/ NC | 46/31    | 59/45 | 55.4/56.8    | NA    | NA                      | Cu                                   | Plasma & Serum |
| Rousselot et al. 2000      | France      | ALS/ NC | 43/62    | 60/47 | 60/60        | 33.6  | El Escorial             | GSH-Px                               | Plasma         |
| Sohmiya et al. 2005        | Japan       | ALS/ NC | 20/20    | 65/65 | 61.2/62.1    | 46.9  | El Escorial             | Uric acid, Co-Q10, Total cholesterol | Plasma         |
| Sutedja et al. 2010        | Netherlands | ALS/ NC | 303/2100 | 57/54 | 64/59        | NA    | El Escorial             | Total cholesterol, LDL, HDL          | Plasma         |
| To'rsdóttir et al. 2000    | Iceland     | ALS/ NC | 14/14    | 50/50 | 61.7/61.7    | 61.2  | El Escorial             | Cu, Ceruloplasmin                    | Plasma & Serum |
| Veyrat-Durebex et al. 2014 | France      | ALS/ NC | 104/145  | 52/53 | 67.6/68.4    | NA    | El Escorial             | Transferrin                          | Serum          |
| Wuolikainen et al. 2014    | Sweden      | ALS/ NC | 52/40    | 56/53 | 58.89/61.6   | NA    | EFNS consensus criteria | Total cholesterol, TG                | Plasma         |
| Yang et al. 2013           | Korea       | ALS/ NC | 95/99    | 63/65 | 54.14/52.52  | NA    | El Escorial             | Total cholesterol, LDL, HDL, TG      | Serum          |
| Zheng et al. 2014          | China       | ALS/ NC | 512/501  | 58/58 | 53.3/53.4    | 38.4  | El Escorial             | Uric acid                            | Serum          |
| Zheng et al. 2017          | China       | ALS/ NC | 54/46    | 61/   | 53.85/51.26  | 14.99 | El Escorial             | Transferrin                          | Serum          |
| Zoccolella et al. 2010     | Italy       | ALS/ NC | 132/337  | 61/65 | 65.7/64      | 21    | El Escorial             | Uric acid                            | Serum          |

**Abbreviations:** ALS, amyotrophic lateral sclerosis; NC, normal control; 8-OHdG, 8 hydroxyguanosine; MDA, Malondialdehyde; SOD, superoxide dismutase; AOPP, Advanced Oxidation Protein Product; LDL, low density lipoprotein; HDL, high density lipoprotein; Co-Q10, coenzyme-Q10; TG, Triglycerides; AOPP, advanced oxidation protein products; GSH-Px, glutathione peroxidase; NA, not available.
